# Supplementary material
Source: PubMed Central journal article supplement (PMC3084036)
Supplement: NIHMS288748-supplement-01.pdf [file NIHMS288748-supplement-01.pdf]

# Structure and binding mechanism of vascular endothelial cadherin, a divergent classical cadherin

Julia Brasch<sup>1</sup>, Oliver J. Harrison<sup>1,2</sup>, Goran Ahlsen<sup>1</sup>, Stewart M. Carnally<sup>3</sup>, Robert M. Henderson<sup>3</sup>,  
Barry Honig<sup>1,2,4\*</sup> and Lawrence Shapiro<sup>1,5\*</sup>

## Supplementary Material

**Supplementary Figure 1:** Liposome aggregation by human VE-cadherin ectodomains.

**Supplementary Table I:** Percent sequence identities between EC1 and EC1-2 domains of VE-cadherin and other classical cadherins.

**Supplementary Table II:** Root mean square deviations (RMSD) between superposed EC1, EC2 and EC1-2 domains of type I and type II cadherins.

**Supplementary Table III:** Buried accessible surface area (BSA) for type I and type II cadherin interfaces.

Correspondence should be addressed to

L.S. ([LSS8@columbia.edu](mailto:LSS8@columbia.edu)); Department of Biochemistry and Molecular Biophysics, Columbia University, 701 West 168<sup>th</sup> Street, New York, NY 10032, USA; phone: 1-212-342-6029; fax: 1-212-342-6026

or B.H. ([BH6@columbia.edu](mailto:BH6@columbia.edu)); Howard Hughes Medical Institute, Columbia University, 1130 St Nicholas Avenue, New York, NY 10032, USA; phone: 1-212-851-4651; fax: 1-212-851-4650

<sup>1</sup>Department of Biochemistry and Molecular Biophysics, Columbia University, 701 West 168<sup>th</sup> Street, New York, NY 10032, USA. <sup>2</sup>Howard Hughes Medical Institute, Columbia University, 1130 St Nicholas Avenue, New York, NY 10032, USA. <sup>3</sup>Department of Pharmacology, University of Cambridge, Tennis Court Road, Cambridge CB2 1PD, UK. <sup>4</sup>Center for Computational Biology and Bioinformatics, Columbia University, 1130 St Nicholas Avenue, New York, NY 10032, USA. <sup>5</sup>Edward S. Harkness Eye Institute, Columbia University in the City of New York, 635 West 165<sup>th</sup> Street, New York, NY 10032, USA.

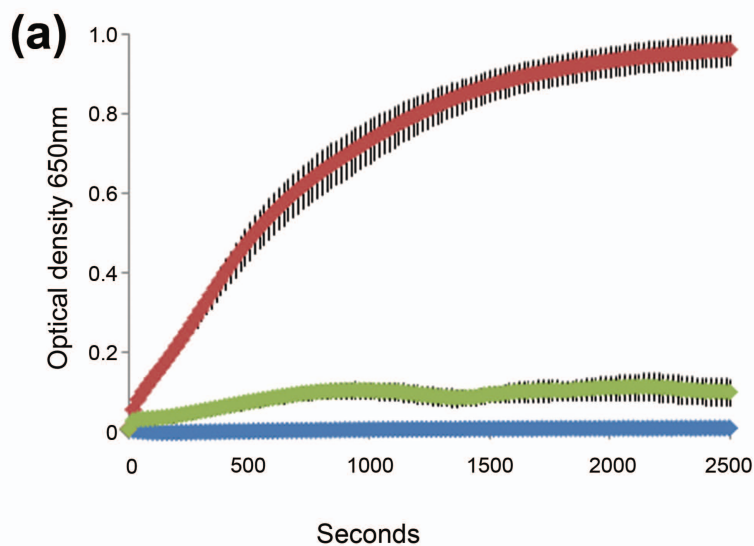

- ◆ VE-cadherin EC15 wt
- ◆ VE-cadherin W2A W4A
- ◆ negative control (no protein)

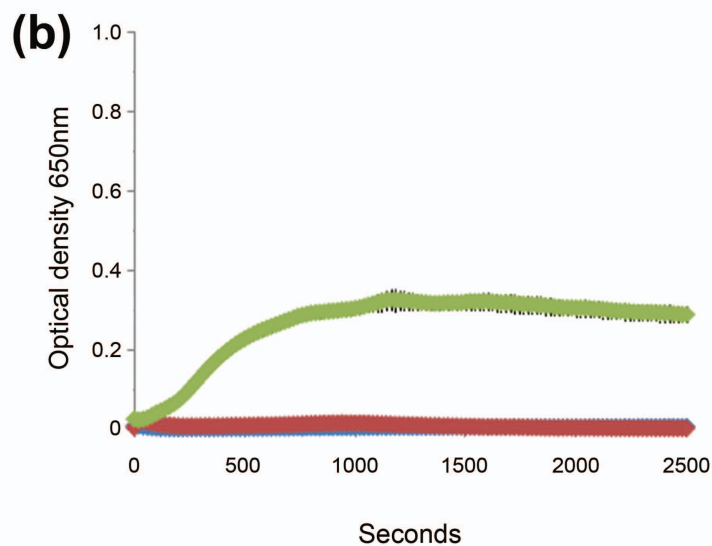

- ◆ VE-cadherin EC3-5
- ◆ VE-cadherin EC3-5 minimal glycan
- ◆ negative control (no protein)

### Supplementary Figure 1

Liposome aggregation by human VE-cadherin ectodomains. In consecutive liposome aggregation experiments each spanning a time of 2,500 seconds, the aggregation of liposomes coated with VE-cadherin ectodomain fragments was monitored by light absorption at 650nm. Uncoated liposomes served as negative control (blue trace). (a) Human VE-cadherin ectodomains aggregate liposomes (red trace). Introduction of double strand swap mutation W2A W4A into VE-cadherin strongly diminishes liposome aggregation (green trace). (b) Truncated human VE-cadherin spanning domains EC3-5, which lack adhesive domains EC1-2, fail to aggregate liposomes (red trace). However, identical protein fragments with reduced N-linked glycosylation due to expression in glycosylation deficient HEK 293 GNTI(-) cells are able to aggregate liposomes (green trace).

## Supplementary Tables

**Supplementary Table 1:** Sequence identities given in percent between EC1 and EC1-2 domains of VE-cadherin and other classical cadherins.

|           | EC1 | VE  | 11  | 8   | 10  | 9   | 6   | N   | E   |
|-----------|-----|-----|-----|-----|-----|-----|-----|-----|-----|
| EC12      |     |     |     |     |     |     |     |     |     |
| <b>VE</b> |     | 100 | 45  | 45  | 38  | 41  | 39  | /   | 26  |
| <b>11</b> |     | 47  | 100 | 72  | 64  | 62  | 62  | 35  | 28  |
| <b>8</b>  |     | 45  | 76  | 100 | 59  | 59  | 60  | 35  | 29  |
| <b>10</b> |     | 43  | 71  | 66  | 100 | 78  | 84  | 32  | 28  |
| <b>9</b>  |     | 45  | 68  | 65  | 82  | 100 | 79  | 32  | 27  |
| <b>6</b>  |     | 43  | 69  | 67  | 84  | 82  | 100 | 34  | 29  |
| <b>N</b>  |     | 34  | 40  | 40  | 38  | 38  | 39  | 100 | 58  |
| <b>E</b>  |     | 31  | 33  | 33  | 33  | 32  | 34  | /   | 100 |

**Supplementary Table 2:** Root mean square deviations between superposed EC1 (rose), EC2 (purple) and EC12 (blue) domains of type I and type II cadherins.

|      | EC1 |      |                   |      |                 |      |      |      |
|------|-----|------|-------------------|------|-----------------|------|------|------|
|      | EC2 | VE   | 11                | 8    | MN              | E    | N    | C    |
| EC12 |     |      |                   |      |                 |      |      |      |
| VE   |     | -    | 1.16 <sup>a</sup> | 1.15 | 1.31            | 1.52 | 1.66 | 1.84 |
|      |     |      | 1.02              | 1.16 | NA <sup>b</sup> | 1.09 | 1.17 | 1.27 |
| 11   |     | 1.86 | -                 | 0.78 | 0.55            | 1.42 | 1.67 | 1.67 |
|      |     |      |                   | 0.96 | NA              | 1.01 | 1.04 | 1.18 |
| 8    |     | 1.46 | 1.65              | -    | 0.80            | 1.34 | 1.63 | 1.62 |
|      |     |      |                   |      | NA              | 1.35 | 1.35 | 1.30 |
| MN   |     | NA   | NA                | NA   | -               | 1.49 | 1.75 | 1.75 |
|      |     |      |                   |      |                 | NA   | NA   | NA   |
| E    |     | 1.52 | 2.31              | 1.87 | NA              | -    | 0.94 | 0.86 |
|      |     |      |                   |      |                 |      | 0.73 | 0.69 |
| N    |     | 1.70 | 2.13              | 1.83 | NA              | 0.94 | -    | 1.01 |
|      |     |      |                   |      |                 |      |      | 0.80 |
| C    |     | 2.01 | 2.36              | 2.40 | NA              | 1.14 | 1.21 | -    |

<sup>a</sup> In case of two molecules present in the crystallographic asymmetric unit, values retrieved by superpositions of chain A only.

<sup>b</sup> Structural data only available for domain EC1.

**Supplementary Table 3:** Buried accessible surface area (BSA) for type I and type II cadherin interfaces, BSA value for one protomer given.

| <b>Protein</b>      | <b>BSA [<math>\text{\AA}^2</math>]</b> | <b>pdb ID</b> |
|---------------------|----------------------------------------|---------------|
| <b>EC1-domain</b>   |                                        |               |
| ck VE-cadherin      | 913.0 <sup>a</sup>                     | 3PPE          |
| m cadherin-8        | 1264.2                                 | 1ZXK          |
| m cadherin-11       | 1225.8                                 | 2A4C          |
| ck MN-cadherin      | 1254.9                                 | 1ZVN          |
| m E-cadherin        | 817.3                                  | 2QVF          |
| m N-cadherin        | 875.8                                  | 2QVI          |
| x C-cadherin        | 847.6                                  | 1L3W          |
| <b>EC12-domains</b> |                                        |               |
| ck VE-cadherin      | 1066.2                                 | 3PPE          |
| m cadherin-8        | 1271.9                                 | 2A62          |
| m cadherin-11       | 1529.2                                 | 2S4E          |
| m E-cadherin        | 817.3                                  | 2QVF          |
| m N-cadherin        | 875.8                                  | 2QVI          |
| x C-cadherin        | 847.6                                  | 1L3W          |

<sup>a</sup> In case of two molecules per asymmetric unit, values given for chain A.
